# Supplementary material for: Comparative safety of nivolumab plus ipilimumab versus nivolumab plus relatlimab in advanced melanoma: a real-world pharmacovigilance study
Source: Research Square preprint supplement (doi:10.21203/rs.3.rs-6426078/v1), 2025-05-13
Supplement: Supplementary file 1 [file df4b9e5fa634f233392ba208.docx]

**Supplymentary Table 1. The classification and search term of immune checkpoint inhibitors used in the disproportionality analysis.**

| **Classes** | **Drug name** | **The search term (combined generic names, trade names and research codes)** |
| --- | --- | --- |
| Programmed death-1 (PD-1) inhibitor | Nivolumab | Nivolumab  Opdivo  BMS-936558  ONO-4538  DX-1106 |
| Cytotoxic T-lymphocyte antigen-4 (CTLA-4) inhibitor | Ipilimumab | Ipilimumab  Yervoy  BMS-734016  MDX-010 |
| Lymphocyte - activation gene 3 (LAG-3)inhibitor | Relatlimab/Nivolumab | Nivolumab\Relatlimab  Nivolumab\Relatlimab-rmbw  Opdualag  BMS-986016 |
| Relatlimab | Relatlimab |

**Supplementary Table 2. 2 × 2 contingency table for the calculation of ROR and IC*.**

|  | **Target AEs** | **Other AEs** |
| --- | --- | --- |
| **Target drugs** | a | b |
| **Other drugs** | c | d |

* a: the number of records for the selected medication-AE combinations; b: the number of records with any other AEs reported for the selected medications; c: the number of records with any target AEs for other medications; d: the number of records reported other AEs for other medications.

**Supplementary Table 3. Calculation formulas for ROR, IC and relevant parameters.**

| **Parameters** | **Formulas** |
| --- | --- |
| ROR |  |
| IC |  |
| ROR 95%CI |  |
| IC025 |  |
| IC075 |  |
| Nexpected | Ndrug*Nevent/Ntotal |
| Nobserved | a |
| Ndrug | ab |
| Nevent | ac |
| Ntotal | abcd |
